# Supplementary material
Source: publisher site journal article supplement (https://www.dovepress.com/article/272943)
Supplement: Supplementary file 1 [file 272943-revised-supplementary-materials-1.pdf › 272943-revised-supplementary-materials-1.pdf]

| Monday                                               | Tuesday                                           | Wednesday                                               | Thursday                                          | Friday                                                                            |
|------------------------------------------------------|---------------------------------------------------|---------------------------------------------------------|---------------------------------------------------|-----------------------------------------------------------------------------------|
| <b>Team/Doctor´s visit</b><br>08:00 - 08:30          | <b>Team/Doctor´s visit</b><br>08:00 - 09:00       | <b>Team/Doctor´s visit</b><br>08:00 - 08:30             | <b>Team</b><br>08:00 - 09:00                      | <b>Team/Doctor´s visit</b><br>08:00 - 08:30                                       |
| <b>08:30 - 11:00 Uhr</b><br>PT/Psych Appointments    | <b>9:00 - 10:45</b><br>PT/Psych Appointments      | <b>08:30 - 10:30</b><br>PT/Psych Appointments           | <b>9:00 - 11:00</b><br>PT/Psych Appointments      |                                                                                   |
| <b>11:00 - 11:45</b><br><b>Basic information</b>     | <b>10:45 - 12:00</b><br><b>Work hardening</b>     | <b>10:30 - 11:00</b><br><b>Relaxation therapy</b>       | <b>9:00 - 11:00</b><br><b>Doctor´s visit</b>      | <b>8:30 - 9:45</b><br><b>Pain management group</b>                                |
| <b>Pause 11:45 - 12:00</b>                           | <b>Pause 12:00 - 12:30</b>                        | <b>Pause 11:00 - 12:00</b>                              | <b>Pause: 11:00 - 11:15</b>                       | <b>Pause: 09:45 - 10:00</b>                                                       |
| <b>12:15 - 13:30</b><br><b>Gymnastics</b>            | <b>12:30 - 13:15</b><br><b>Sport theory</b>       | <b>12:00 - 13:30</b><br><b>Medical training therapy</b> | <b>11:15 - 12:00</b><br><b>Basic information</b>  | <b>10:00 - 11:00</b><br><b>Mastery of the pain puzzle</b><br>(Intervention group) |
| <b>Pause: 13:30 - 14:30</b>                          | <b>Pause: 13:15 - 14:15</b>                       | <b>Pause: 13:30 - 13:45</b>                             | <b>Pause: 12:00 - 12:15</b>                       | <b>Pause: 11:00 - 12:00</b>                                                       |
| <b>14:30 - 15:45</b><br><b>Pain management group</b> | <b>14:15 - 15:00</b><br><b>Relaxation therapy</b> | <b>13:45 - 14:15</b><br><b>Aqua therapy</b>             | <b>12:15 - 13:15</b><br><b>Endurance training</b> | <b>12:00 - 13:30</b><br><b>Medical training therapy</b>                           |
| <b>15:45 - 16:30</b><br>PT/Psych Appointments        | <b>Pause 15:00 - 15:15</b>                        | <b>Pause 14:15 - 14:45</b>                              | <b>Pause: 13:15 - 14:15</b>                       | <b>Pause 13:30 - 13:45</b>                                                        |
|                                                      | <b>15:15 - 16:15</b><br><b>Endurance training</b> | <b>14:45 - 16:00</b><br><b>Gymnastics</b>               | <b>14:15 - 15:30</b><br><b>Work hardening</b>     | <b>13:45 - 14:15</b><br><b>Aqua therapy</b>                                       |
|                                                      |                                                   | <b>16:00 - 16:30</b><br>PT/Psych Appointments           | <b>15:30 - 16:30</b><br>PT/Psych Appointments     | <b>14:15 - 16:30</b><br>PT/Psych Appointments                                     |
